# Supplementary material
Source: publisher figshare collection journal article supplement (https://brill.figshare.com/ndownloader/files/22863581)
Supplement: Supplementary file 1 [file 22863581]

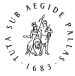

BRILL

## Online Supplement to ‘The Happiness of Nations’

TABLE A1 Median net wealth, OECD countries, 2016 or latest available

| Country                       | Median net wealth (local currency) | US \$ <sup>[a]</sup> |
|-------------------------------|------------------------------------|----------------------|
| Australia                     | 380000.00                          | 256756.76            |
| Austria                       | 85914.00                           | 94505.40             |
| Belgium                       | 217943.00                          | 239737.30            |
| Canada                        | 258100.00                          | 196156.00            |
| Chile                         | 17747804.00                        | 23072.15             |
| Czech Republic <sup>[b]</sup> |                                    | 55347.6              |
| Denmark                       | 212967.00                          | 31945.05             |
| Estonia                       | 43474.00                           | 47821.4              |
| Finland                       | 110000.00                          | 121000               |
| France                        | 113300.00                          | 124630               |
| Germany                       | 60790.00                           | 66869                |
| Greece                        | 65058.00                           | 71563.80             |
| Hungary                       | 8018422.00                         | 26460.79             |
| Iceland <sup>[b]</sup>        |                                    | 127980.27            |
| Ireland                       | 100600.00                          | 110660               |
| Israel <sup>[b]</sup>         |                                    | 55347.6              |
| Italy                         | 146198.00                          | 160817.80            |
| Japan                         | 20147000.00                        | 185352.40            |
| Korea                         | 164840000.00                       | 140114               |
| Latvia                        | 14180.00                           | 15598                |
| Lithuania <sup>[b]</sup>      |                                    | 15598                |
| Luxembourg                    | 437510.00                          | 481261.0             |
| Mexico <sup>[b]</sup>         |                                    | 15598                |
| Netherlands                   | 78755.00                           | 86630.50             |
| New Zealand                   | 289000.00                          | 188888.88            |
| Norway                        | 1163457.00                         | 127980.27            |
| Poland                        | 238885.48                          | 62110.1              |
| Portugal                      | 71215.00                           | 78336.5              |
| Slovak Republic               | 50316.00                           | 55347.6              |
| Slovenia                      | 80367.00                           | 88403.7              |
| Spain                         | 159639.00                          | 175602.9             |

TABLE A1 Median net wealth, OECD countries, 2016 or latest available (*cont.*)

| Country                    | Median net wealth (local currency) | US \$ <sup>[a]</sup> |
|----------------------------|------------------------------------|----------------------|
| Sweden <sup>[b]</sup>      | 127980.27                          |                      |
| Switzerland <sup>[c]</sup> | 227890                             |                      |
| Turkey <sup>[b]</sup>      |                                    | 15598                |
| United Kingdom             | 183000.00                          | 237662.34            |
| United States              | 77400.00                           | 77400.00             |

[a] Converted into US \$ at the exchange rate on January 28, 2020

[b] imputed values based on data on comparable similar counties for the sake of computing z-score totals and averages

[c] 2019 the Credit Suisse Global Wealth Report 2019.

*Note:* According to the Credit Suisse Global Wealth Report 2018 'median wealth of just US \$ 61,670 relegates the United States to 18th place' across world countries

*SOURCE:* OECD STATISTICS, [HTTPS://STATS.OECD.ORG/INDEX.ASPX?DATASETCODE=WEALTH](https://stats.oecd.org/index.aspx?datasetcode=WEALTH)

TABLE A2 Gross national income (GNI) per capita, OECD countries, 2018 (US \$ PPP)

| Country        | GNI   |
|----------------|-------|
| Australia      | 44097 |
| Austria        | 46231 |
| Belgium        | 43821 |
| Canada         | 43602 |
| Chile          | 21972 |
| Czech Republic | 31597 |
| Denmark        | 48836 |
| Estonia        | 30379 |
| Finland        | 41779 |
| France         | 40511 |
| Germany        | 46946 |
| Greece         | 24909 |
| Hungary        | 27144 |
| Iceland        | 47566 |
| Ireland        | 55660 |
| Israel         | 33650 |
| Italy          | 36141 |
| Japan          | 40799 |

TABLE A2    Gross national income (GNI) (*cont.*)

| Country         | GNI   |
|-----------------|-------|
| Korea           | 36757 |
| Latvia          | 26301 |
| Lithuania       | 29775 |
| Luxembourg      | 65543 |
| Mexico          | 17628 |
| Netherlands     | 50013 |
| New Zealand     | 35108 |
| Norway          | 68059 |
| Poland          | 27626 |
| Portugal        | 27935 |
| Slovak Republic | 30672 |
| Slovenia        | 32143 |
| Spain           | 35041 |
| Sweden          | 47955 |
| Switzerland     | 59375 |
| Turkey          | 24905 |
| United Kingdom  | 39507 |
| United States   | 56140 |

*Note:* PPP – purchasing power parity  
*SOURCE:* HUMAN DEVELOPMENT INDEX 2019, [HTTP://HDR.UNDP.ORG/EN/CONTENT/2019-HUMAN-DEVELOPMENT-INDEX-RANKING](http://hdr.undp.org/en/content/2019-human-development-index-ranking)

TABLE A3    Share of top 1% of wealth, OECD countries, 2016 or latest available

| Country                       | Top 1% share percent |
|-------------------------------|----------------------|
| Australia                     | 15.00                |
| Austria                       | 25.53                |
| Belgium                       | 12.06                |
| Canada                        | 15.50                |
| Chile                         | 17.40                |
| Czech Republic <sup>[a]</sup> | 9.32                 |
| Denmark                       | 23.62                |
| Estonia                       | 21.23                |
| Finland                       | 13.31                |

TABLE A3 Share of top 1% of wealth, OECD countries (*cont.*)

| Country                    | Top 1% share percent |
|----------------------------|----------------------|
| France                     | 18.65                |
| Germany                    | 23.66                |
| Greece                     | 9.16                 |
| Hungary                    | 17.23                |
| Iceland <sup>[b]</sup>     | 23.00                |
| Ireland                    | 14.18                |
| Israel <sup>[c]</sup>      | 22.50                |
| Italy                      | 11.69                |
| Japan                      | 10.77                |
| Korea <sup>[d]</sup>       | 30.00                |
| Latvia                     | 21.39                |
| Lithuania                  | 21.39                |
| Luxembourg                 | 18.81                |
| Mexico <sup>[a]</sup>      | 17.40                |
| Netherlands                | 27.83                |
| New Zealand <sup>[e]</sup> | 24.00                |
| Norway                     | 20.13                |
| Poland                     | 11.73                |
| Portugal                   | 14.44                |
| Slovak Republic            | 9.32                 |
| Slovenia                   | 23.03                |
| Spain                      | 16.32                |
| Sweden <sup>[a]</sup>      | 20.13                |
| Switzerland <sup>[a]</sup> | 23.66                |
| Turkey <sup>[a]</sup>      | 17.40                |
| United Kingdom             | 20.50                |
| United States              | 42.48                |

[a] Imputed values

[b] <http://www.ruv.is/frett/rikasta-prosentid-a-naer-fjordung-audsins>

[c] <https://ref-inst.org/en/wealth-distribution-in-israel/>

[d] The Credit Suisse Global Wealth Report 2019

[e] OECD Statistics and Data Directorate, Inequalities in Household Wealth Across OECD Countries: Evidence from the OECD Wealth Distribution  
[https://www.oecd.org/officialdocuments/publicdisplaydocumentpdf/?cote=SDD/DOC\(2018\)1&docLanguage=En](https://www.oecd.org/officialdocuments/publicdisplaydocumentpdf/?cote=SDD/DOC(2018)1&docLanguage=En)

SOURCE: OECD STATISTICS, [HTTPS://STATS.OECD.ORG/INDEX.ASPX?DATASETCODE=WEALTH](https://stats.oecd.org/index.aspx?datasetcode=wealth)

TABLE A4 Gini coefficient on disposable (after tax and transfer)  
equivalised household income, OECD countries,  
2018 or latest available

| Country         | Gini % |
|-----------------|--------|
| Australia       | 33.0   |
| Austria         | 28.4   |
| Belgium         | 26.6   |
| Canada          | 31.0   |
| Chile           | 46.0   |
| Czech Republic  | 25.3   |
| Denmark         | 26.1   |
| Estonia         | 31.4   |
| Finland         | 26.6   |
| France          | 29.1   |
| Germany         | 29.4   |
| Greece          | 33.3   |
| Hungary         | 28.2   |
| Iceland         | 25.5   |
| Ireland         | 30.9   |
| Israel          | 34.4   |
| Italy           | 32.8   |
| Japan           | 33.9   |
| Korea           | 35.5   |
| Latvia          | 34.6   |
| Lithuania       | 37.8   |
| Luxembourg      | 30.4   |
| Mexico          | 45.8   |
| Netherlands     | 28.5   |
| New Zealand     | 34.9   |
| Norway          | 26.2   |
| Poland          | 28.4   |
| Portugal        | 33.1   |
| Slovak Republic | 24.1   |
| Slovenia        | 24.4   |
| Spain           | 34.1   |
| Sweden          | 28.2   |
| Switzerland     | 29.6   |
| Turkey          | 40.4   |
| United Kingdom  | 35.7   |
| United States   | 39.0   |

SOURCE: OECD DATA, [HTTPS://DATA.OECD.ORG/INEQUALITY/  
INCOME-INEQUALITY.HTM](https://data.oecd.org/inequality/income-inequality.htm)

TABLE A5 General poverty rates after taxes and transfers,  
working age group 17–66 years, OECD countries,  
2018 or latest available

| Country         | Rate % |
|-----------------|--------|
| Australia       | 12.1   |
| Austria         | 9.8    |
| Belgium         | 9.7    |
| Canada          | 12.1   |
| Chile           | 16.5   |
| Czech Republic  | 5.6    |
| Denmark         | 5.8    |
| Estonia         | 15.7   |
| Finland         | 6.3    |
| France          | 8.3    |
| Germany         | 10.4   |
| Greece          | 14.4   |
| Hungary         | 7.8    |
| Iceland         | 5.4    |
| Ireland         | 9.2    |
| Israel          | 17.9   |
| Italy           | 13.7   |
| Japan           | 15.7   |
| Korea           | 17.4   |
| Latvia          | 16.8   |
| Lithuania       | 16.9   |
| Luxembourg      | 11.1   |
| Mexico          | 16.6   |
| Netherlands     | 8.3    |
| New Zealand     | 10.9   |
| Norway          | 8.4    |
| Poland          | 10.3   |
| Portugal        | 12.5   |
| Slovak Republic | 8.5    |
| Slovenia        | 8.7    |
| Spain           | 15.5   |
| Sweden          | 9.3    |
| Switzerland     | 9.1    |
| Turkey          | 17.2   |
| United Kingdom  | 11.9   |
| United States   | 17.8   |

*Note:* the poverty rate is the percentage of people whose income falls below the poverty line taken as half the median household income of the total population.

*SOURCE:* OECD DATA, [HTTPS://DATA.OECD.ORG/INEQUALITY/POVERTY-RATE.HTM](https://data.oecd.org/inequality/poverty-rate.htm)

TABLE A6 Child poverty rates after taxes and transfers, age group  
0-17 years, OECD countries, 2018 or latest available

| Country         | Rate % |
|-----------------|--------|
| Australia       | 12.5   |
| Austria         | 11.5   |
| Belgium         | 12.3   |
| Canada          | 11.6   |
| Chile           | 21.5   |
| Czech Republic  | 8.5    |
| Denmark         | 3.7    |
| Estonia         | 9.6    |
| Finland         | 3.6    |
| France          | 11.5   |
| Germany         | 12.3   |
| Greece          | 17.6   |
| Hungary         | 7.7    |
| Iceland         | 5.8    |
| Ireland         | 10.0   |
| Israel          | 23.7   |
| Italy           | 17.3   |
| Japan           | 13.9   |
| Korea           | 14.5   |
| Latvia          | 13.2   |
| Lithuania       | 17.7   |
| Luxembourg      | 13.0   |
| Mexico          | 19.8   |
| Netherlands     | 10.9   |
| New Zealand     | 14.1   |
| Norway          | 8.0    |
| Poland          | 9.3    |
| Portugal        | 15.5   |
| Slovak Republic | 14.0   |
| Slovenia        | 7.1    |
| Spain           | 22.0   |
| Sweden          | 9.3    |
| Switzerland     | 9.5    |
| Turkey          | 25.3   |
| United Kingdom  | 12.9   |
| United States   | 21.2   |

*Note:* the child poverty rate is the percentage of children 0-17 years old living in families whose income falls below the poverty line taken as half the median household income of the total population.

*SOURCE:* OECD DATA, [HTTPS://DATA.OECD.ORG/INEQUALITY/POVERTY-RATE.HTM](https://data.oecd.org/inequality/poverty-rate.htm)

TABLE A7 Elderly poverty rate after taxes and transfers, age group 66 or more years, OECD countries, 2018 or latest available

| Country                    | Rate % |
|----------------------------|--------|
| Australia                  | 23.2   |
| Austria                    | 8.7    |
| Belgium                    | 8.2    |
| Canada                     | 12.2   |
| Chile                      | 17.6   |
| Czech Republic             | 4.5    |
| Denmark                    | 3.0    |
| Estonia                    | 35.7   |
| Finland                    | 6.3    |
| France                     | 3.4    |
| Germany                    | 9.6    |
| Greece                     | 7.8    |
| Hungary                    | 5.2    |
| Iceland                    | 2.8    |
| Ireland                    | 6.0    |
| Israel                     | 19.9   |
| Italy                      | 10.3   |
| Japan                      | 19.6   |
| Korea                      | 43.8   |
| Latvia                     | 32.7   |
| Lithuania                  | 25.1   |
| Luxembourg                 | 7.7    |
| Mexico                     | 24.7   |
| Netherlands                | 3.1    |
| New Zealand <sup>[a]</sup> | 13.0   |
| Norway                     | 4.3    |
| Poland                     | 9.3    |
| Portugal                   | 9.5    |
| Slovak Republic            | 4.3    |
| Slovenia                   | 12.3   |
| Spain                      | 9.4    |
| Sweden                     | 11.3   |
| Switzerland                | 19.5   |
| Turkey                     | 17.0   |
| United Kingdom             | 15.3   |
| United States              | 23.1   |

[a] New Zealand – OECD [https://www.oecd.org/els/public-pensions/New%20Zealand\\_eng\\_final.pdf](https://www.oecd.org/els/public-pensions/New%20Zealand_eng_final.pdf)

*Note:* the elderly poverty rate is the percentage of people 66 year-old or more whose income falls below the poverty line taken as half the median household income of the total population.

*SOURCE:* OECD DATA, [HTTPS://DATA.OECD.ORG/INEQUALITY/POVERTY-RATE.HTM](https://data.oecd.org/inequality/poverty-rate.htm)



TABLE A8 Real minimum wages, OECD countries, 2018  
(in 2018 constant prices at 2018 US \$ PPP)

| Country                    | Wages   |
|----------------------------|---------|
| Australia                  | 23975.6 |
| Austria <sup>[a]</sup>     | 20847.4 |
| Belgium                    | 21654.4 |
| Canada                     | 19811.1 |
| Chile                      | 7319.5  |
| Czech Republic             | 10342.4 |
| Denmark <sup>[b]</sup>     | 23520.6 |
| Estonia                    | 9609.1  |
| Finland <sup>[b]</sup>     | 23520.6 |
| France                     | 20903.3 |
| Germany                    | 20847.4 |
| Greece                     | 12128.0 |
| Hungary                    | 10669.4 |
| Iceland <sup>[b]</sup>     | 23520.6 |
| Ireland                    | 20008.7 |
| Israel                     | 15104.2 |
| Italy <sup>[c]</sup>       | 14289.8 |
| Japan                      | 16802.1 |
| Korea                      | 19880.8 |
| Latvia                     | 7829.6  |
| Lithuania                  | 7829.6  |
| Luxembourg                 | 24553.0 |
| Mexico                     | 2188.0  |
| Netherlands                | 23520.6 |
| New Zealand                | 20932.5 |
| Norway <sup>[b]</sup>      | 23520.6 |
| Poland                     | 13214.9 |
| Portugal                   | 12004.1 |
| Slovak Republic            | 10518.4 |
| Slovenia                   | 15269.9 |
| Spain                      | 14289.8 |
| Sweden <sup>[b]</sup>      | 23520.6 |
| Switzerland <sup>[a]</sup> | 20847.4 |
| Turkey                     | 12616.0 |
| United Kingdom             | 20053.1 |
| United States              | 15080.0 |

[a] Estimated by data on Germany

[b] Estimated by data on the Netherlands

[c] Estimated by data on Spain

SOURCE: OECD LIBRARY, [HTTPS://WWW.OECD-ILIBRARY.ORG/EMPLOYMENT/DATA/EARNINGS/REAL-MINIMUM-WAGES\\_DATA](https://www.oecd-ilibrary.org/employment/data/earnings/real-minimum-wages_data)  
-00656-EN

TABLE A9 Strictness of employment protection, individual dismissals (regular contracts), OECD countries, 2014 or latest available

| Country         | Protection |
|-----------------|------------|
| Australia       | 1.67       |
| Austria         | 2.37       |
| Belgium         | 1.89       |
| Canada          | .92        |
| Chile           | 2.63       |
| Czech Republic  | 2.92       |
| Denmark         | 2.20       |
| Estonia         | 1.81       |
| Finland         | 2.17       |
| France          | 2.38       |
| Germany         | 2.68       |
| Greece          | 2.12       |
| Hungary         | 1.59       |
| Iceland         | 1.73       |
| Ireland         | 1.40       |
| Israel          | 2.04       |
| Italy           | 2.68       |
| Japan           | 1.37       |
| Korea           | 2.37       |
| Latvia          | 2.69       |
| Lithuania       | 2.42       |
| Luxembourg      | 2.25       |
| Mexico          | 2.03       |
| Netherlands     | 2.82       |
| New Zealand     | 1.39       |
| Norway          | 2.33       |
| Poland          | 2.23       |
| Portugal        | 3.18       |
| Slovak Republic | 1.84       |
| Slovenia        | 2.16       |
| Spain           | 2.05       |
| Sweden          | 2.61       |
| Switzerland     | 1.60       |
| Turkey          | 2.31       |
| United Kingdom  | 1.10       |
| United States   | .26        |

*Note:* Data range from 0 to 6 with higher scores representing stricter regulation of individual dismissal of employees on regular/indefinite contracts

*SOURCE:* OECD STATISTICS, [HTTPS://STATS.OECD.ORG/VIEWHTML.ASPX?DATASETCODE=EPL\\_R&LANG=EN](https://stats.oecd.org/viewhtml.aspx?datasetcode=EPL_R&lang=en)

TABLE A10 Collective bargaining coverage, percentage of employees with the right to bargain, OECD countries, 2017 or latest available

| Country         | Coverage % |
|-----------------|------------|
| Australia       | 60.0       |
| Austria         | 98.0       |
| Belgium         | 96.0       |
| Canada          | 28.1       |
| Chile           | 19.6       |
| Czech Republic  | 30.4       |
| Denmark         | 82.0       |
| Estonia         | 18.6       |
| Finland         | 89.3       |
| France          | 98.5       |
| Germany         | 56.0       |
| Greece          | 25.5       |
| Hungary         | 22.8       |
| Iceland         | 92.0       |
| Ireland         | 32.5       |
| Israel          | 26.1       |
| Italy           | 80.0       |
| Japan           | 16.5       |
| Korea           | 13.1       |
| Latvia          | 13.8       |
| Lithuania       | 7.1        |
| Luxembourg      | 59.0       |
| Mexico          | 13.8       |
| Netherlands     | 77.6       |
| New Zealand     | 15.3       |
| Norway          | 72.5       |
| Poland          | 17.2       |
| Portugal        | 73.9       |
| Slovak Republic | 25.0       |
| Slovenia        | 70.9       |
| Spain           | 83.6       |
| Sweden          | 90.0       |
| Switzerland     | 57.9       |
| Turkey          | 7.0        |
| United Kingdom  | 26.0       |
| United States   | 11.6       |

SOURCE: OECD STATISTICS, [HTTPS://STATS.OECD.ORG/INDEX.ASPX?DATASETCODE=CBC#](https://stats.oecd.org/index.aspx?datasetcode=cbc#)

TABLE A11 Unemployment benefits, net replacement rates  
in unemployment (duration of 60 months),  
OECD countries, 2018 or latest available

| Country               | Rates % |
|-----------------------|---------|
| Australia             | 39      |
| Austria               | 59      |
| Belgium               | 55      |
| Canada                | 33      |
| Chile                 | 4       |
| Czech Republic        | 46      |
| Denmark               | 75      |
| Estonia               | 34      |
| Finland               | 61      |
| France                | 48      |
| Germany               | 48      |
| Greece                | 22      |
| Hungary               | 15      |
| Iceland               | 54      |
| Ireland               | 62      |
| Israel                | 23      |
| Italy                 | 0       |
| Japan                 | 58      |
| Korea                 | 32      |
| Latvia                | 32      |
| Lithuania             | 24      |
| Luxembourg            | 59      |
| Mexico <sup>[a]</sup> | 0       |
| Netherlands           | 66      |
| New Zealand           | 45      |
| Norway                | 47      |
| Poland                | 32      |
| Portugal              | 23      |
| Slovak Republic       | 22      |
| Slovenia              | 47      |
| Spain                 | 32      |
| Sweden                | 59      |
| Switzerland           | 71      |
| Turkey                | 0       |
| United Kingdom        | 48      |
| United States         | 8       |

[a] OECD Employment Outlook 2018 [https://www.oecd-ilibrary.org/sites/empl\\_outlook-2018-9-en/index.html?itemId=/content/component/empl\\_outlook-2018-9-en](https://www.oecd-ilibrary.org/sites/empl_outlook-2018-9-en/index.html?itemId=/content/component/empl_outlook-2018-9-en)

SOURCE: OECD BENEFITS AND WAGES STATISTICS, [HTTPS://STATS.OECD.ORG/INDEX.ASPX?DATASETCODE=NRR](https://stats.oecd.org/index.aspx?datasetcode=nrr)

TABLE A12 Pensions, gross pension replacement rates,  
OECD countries, 2018

| Country         | Rate % |
|-----------------|--------|
| Australia       | 30.9   |
| Austria         | 76.5   |
| Belgium         | 46.8   |
| Canada          | 39.0   |
| Chile           | 31.2   |
| Czech Republic  | 45.9   |
| Denmark         | 74.4   |
| Estonia         | 47.1   |
| Finland         | 56.5   |
| France          | 60.1   |
| Germany         | 38.7   |
| Greece          | 49.9   |
| Hungary         | 56.1   |
| Iceland         | 66.1   |
| Ireland         | 27.0   |
| Israel          | 50.1   |
| Italy           | 79.5   |
| Japan           | 32.0   |
| Korea           | 37.3   |
| Latvia          | 44.6   |
| Lithuania       | 23.6   |
| Luxembourg      | 78.8   |
| Mexico          | 25.7   |
| Netherlands     | 70.9   |
| New Zealand     | 39.7   |
| Norway          | 45.4   |
| Poland          | 29.4   |
| Portugal        | 74.4   |
| Slovak Republic | 49.6   |
| Slovenia        | 38.8   |
| Spain           | 72.3   |
| Sweden          | 54.1   |
| Switzerland     | 42.4   |
| Turkey          | 67.4   |
| United Kingdom  | 21.7   |
| United States   | 39.4   |

*Note:* The gross replacement rate is defined as gross pension entitlement divided by gross pre-retirement earnings.

*SOURCE:* OECD LIBRARY, [HTTPS://WWW.OECD-ILIBRARY.ORG/](https://www.oecd-ilibrary.org/finance-and-investment/gross-pension-replacement-rates/indicator/english_3diafeb1-en)  
FINANCE-AND-INVESTMENT/GROSS-PENSION-REPLACEMENT  
-RATES/INDICATOR/ENGLISH\_3DIAFEB1-EN

TABLE A13 General government spending on social protection as percent of GDP, OECD countries, 2015 or latest available

| Country                    | % of GDP |
|----------------------------|----------|
| Australia                  | 10.20    |
| Austria                    | 21.20    |
| Belgium                    | 19.40    |
| Canada <sup>[a]</sup>      | 17.33    |
| Chile                      | 6.40     |
| Czech Republic             | 12.50    |
| Denmark                    | 23.50    |
| Estonia                    | 12.70    |
| Finland                    | 25.30    |
| France                     | 24.30    |
| Germany                    | 19.20    |
| Greece                     | 20.30    |
| Hungary                    | 14.60    |
| Iceland                    | 9.10     |
| Ireland                    | 10.30    |
| Israel                     | 10.60    |
| Italy                      | 21.30    |
| Japan                      | 16.10    |
| Korea                      | 6.70     |
| Latvia                     | 11.80    |
| Lithuania                  | 11.10    |
| Luxembourg                 | 18.20    |
| Mexico <sup>[a]</sup>      | 7.52     |
| Netherlands                | 16.50    |
| New Zealand <sup>[a]</sup> | 18.93    |
| Norway                     | 19.50    |
| Poland                     | 15.70    |
| Portugal                   | 18.40    |
| Slovak Republic            | 14.70    |
| Slovenia                   | 17.30    |
| Spain                      | 17.10    |
| Sweden                     | 20.20    |
| Switzerland                | 13.20    |
| Turkey <sup>[a]</sup>      | 12.52    |
| United Kingdom             | 16.00    |
| United States              | 7.80     |

[a] OECD Data, <https://data.oecd.org/socialexp/social-spending.htm>

SOURCE: OECD DATA, [HTTPS://DATA.OECD.ORG/GGA/GENERAL-  
GOVERNMENT-SPENDING.HTM](https://data.oecd.org/gga/general-government-spending.htm)

TABLE A14 Average annual hours actually worked per worker, OECD countries 2018 or latest available

| Country         | Hours  |
|-----------------|--------|
| Australia       | 1665.0 |
| Austria         | 1511.0 |
| Belgium         | 1545.0 |
| Canada          | 1708.0 |
| Chile           | 1941.0 |
| Czech Republic  | 1792.0 |
| Denmark         | 1392.0 |
| Estonia         | 1748.0 |
| Finland         | 1555.0 |
| France          | 1520.0 |
| Germany         | 1362.6 |
| Greece          | 1956.0 |
| Hungary         | 1741.1 |
| Iceland         | 1469.0 |
| Ireland         | 1782.0 |
| Israel          | 1910.1 |
| Italy           | 1722.6 |
| Japan           | 1680.0 |
| Korea           | 1993.0 |
| Latvia          | 1699.0 |
| Lithuania       | 1616.0 |
| Luxembourg      | 1506.0 |
| Mexico          | 2148.0 |
| Netherlands     | 1433.0 |
| New Zealand     | 1756.0 |
| Norway          | 1416.4 |
| Poland          | 1792.0 |
| Portugal        | 1722.0 |
| Slovak Republic | 1698.0 |
| Slovenia        | 1602.8 |
| Spain           | 1701.0 |
| Sweden          | 1474.0 |
| Switzerland     | 1561.0 |
| Turkey          | 1832.0 |
| United Kingdom  | 1538.0 |
| United States   | 1786.0 |

*Note:* 'Average annual hours worked is defined as the total number of hours actually worked per year divided by the average number of people in employment per year.'

*SOURCE:* OECD DATA, [HTTPS://DATA.OECD.ORG/EMP/HOURS-WORKED.HTM](https://data.oecd.org/emp/hours-worked.htm)

TABLE A15 Paid vacations, statutory minimum and collectively agreed annual leave, OECD countries 2016 or latest available

| Country                        | Days of paid annual leave<br>(working days) |
|--------------------------------|---------------------------------------------|
| Australia                      | 20                                          |
| Austria                        | 25                                          |
| Belgium                        | 20                                          |
| Canada                         | 10                                          |
| Chile                          | 15                                          |
| Czech Republic <sup>[a]</sup>  | 25                                          |
| Denmark <sup>[a]</sup>         | 30                                          |
| Estonia                        | 20                                          |
| Finland                        | 25                                          |
| France                         | 25                                          |
| Germany <sup>[a]</sup>         | 30                                          |
| Greece                         | 20                                          |
| Hungary                        | 20                                          |
| Iceland                        | 24                                          |
| Ireland <sup>[a]</sup>         | 24                                          |
| Israel                         | 11                                          |
| Italy <sup>[a]</sup>           | 25                                          |
| Japan                          | 10                                          |
| South Korea                    | 15                                          |
| Latvia                         | 20                                          |
| Lithuania <sup>[b]</sup>       | 20                                          |
| Luxembourg                     | 25                                          |
| Mexico                         | 6                                           |
| Netherlands <sup>[a]</sup>     | 25                                          |
| New Zealand                    | 20                                          |
| Norway <sup>[a]</sup>          | 25                                          |
| Poland                         | 20                                          |
| Portugal                       | 22                                          |
| Slovak Republic <sup>[a]</sup> | 25                                          |
| Slovenia                       | 20                                          |
| Spain                          | 22                                          |
| Sweden                         | 25                                          |



TABLE A15 Paid Vacations, Statutory Minimum (*cont.*)

| Country                      | Days of paid annual leave<br>(working days) |
|------------------------------|---------------------------------------------|
| Switzerland                  | 20                                          |
| Turkey                       | 12                                          |
| United Kingdom               | 28                                          |
| United States <sup>[c]</sup> | 0                                           |

[a] Collectively Agreed

[b] Estimated from Latvia's data

[c] 'In the private sector, the offer of paid leave remains at the discretion of the employer.' (OECD Family Database)

*Note:* Statutory Minimum 'generally reflect(s) those for full-time, full-year private sector employees, working a five-day week, who have been working for their current employer for one year.' (OECD Family Database)

*SOURCE:* OECD FAMILY DATABASE, ADDITIONAL LEAVE ENTITLEMENTS FOR WORKING PARENTS, [HTTPS://WWW.OECD.ORG/ELS/SOC/PF2\\_3\\_ADDITIONAL\\_LEAVE\\_ENTITLEMENTS\\_OF\\_WORKING\\_PARENTS.PDF](https://www.oecd.org/els/soc/PF2_3_ADDITIONAL_LEAVE_ENTITLEMENTS_OF_WORKING_PARENTS.PDF)

TABLE A16 Inequality-adjusted education index, OECD countries 2018

| Country        | Index |
|----------------|-------|
| Australia      | .898  |
| Austria        | .845  |
| Belgium        | .824  |
| Canada         | .867  |
| Chile          | .711  |
| Czech Republic | .880  |
| Denmark        | .892  |
| Estonia        | .862  |
| Finland        | .894  |
| France         | .737  |
| Germany        | .920  |
| Greece         | .727  |

TABLE A16 Inequality-adjusted education index (*cont.*)

| Country         | Index |
|-----------------|-------|
| Hungary         | .790  |
| Iceland         | .892  |
| Ireland         | .885  |
| Israel          | .844  |
| Italy           | .706  |
| Japan           | .836  |
| Korea           | .702  |
| Latvia          | .849  |
| Lithuania       | .852  |
| Luxembourg      | .738  |
| Mexico          | .558  |
| Netherlands     | .862  |
| New Zealand     | .863  |
| Norway          | .879  |
| Poland          | .821  |
| Portugal        | .639  |
| Slovak Republic | .811  |
| Slovenia        | .874  |
| Spain           | .683  |
| Sweden          | .880  |
| Switzerland     | .879  |
| Turkey          | .594  |
| United Kingdom  | .890  |
| United States   | .849  |

SOURCE: UN INEQUALITY-ADJUSTED HUMAN  
DEVELOPMENT INDEX 2019, [HTTP://HDR.UNDP.ORG/](http://hdr.undp.org/en/content/inequality-adjusted-human-development-index-ihdi)  
EN/CONTENT/INEQUALITY-ADJUSTED-HUMAN  
-DEVELOPMENT-INDEX-IHDI

TABLE A17 Population health care coverage for a core set of services, OECD countries 2015 or nearest year

| Country               | Coverage % |
|-----------------------|------------|
| Australia             | 100        |
| Austria               | 99.9       |
| Belgium               | 99.0       |
| Canada                | 100        |
| Chile                 | 92.0       |
| Czech Republic        | 100        |
| Denmark               | 100        |
| Estonia               | 94.0       |
| Finland               | 100        |
| France                | 99.9       |
| Germany               | 99.9       |
| Greece                | 86.0       |
| Hungary               | 95.0       |
| Iceland               | 99.7       |
| Ireland               | 100        |
| Israel                | 100        |
| Italy                 | 100        |
| Japan                 | 100        |
| South Korea           | 100        |
| Latvia <sup>[a]</sup> | 92.4       |
| Lithuania             | 92.4       |
| Luxembourg            | 95.2       |
| Mexico                | 92.3       |
| Netherlands           | 99.9       |
| New Zealand           | 100        |
| Norway                | 100        |
| Poland                | 91.0       |
| Portugal              | 100        |
| Slovak Republic       | 93.2       |
| Slovenia              | 100        |
| Spain                 | 99.9       |
| Sweden                | 100        |
| Switzerland           | 100        |
| Turkey                | 98.4       |
| United Kingdom        | 100        |
| United States         | 90.9       |

[a] Estimated from Lithuania's figure

SOURCE: OECD LIBRARY, [HTTPS://WWW.OECD-ILIBRARY.ORG/DOCSEVER/HEALTH\\_GLANCE-2017-24-EN.PDF?EXPIRES=1580661052&ID=ID&ACCNAME=GUEST&CHECKSUM=AD92F69D383BA5539F2DF7859DF25FDE](https://www.oecd-ilibrary.org/docserver/health_glance-2017-24-en.pdf?expires=1580661052&id=id&accname=guest&checksum=AD92F69D383BA5539F2DF7859DF25FDE)

TABLE A18 Inequality-adjusted life expectancy index, OECD countries, 2018

| Country         | Index |
|-----------------|-------|
| Australia       | 0.938 |
| Austria         | 0.910 |
| Belgium         | 0.912 |
| Canada          | 0.915 |
| Chile           | 0.866 |
| Czech Republic  | 0.884 |
| Denmark         | 0.901 |
| Estonia         | 0.869 |
| Finland         | 0.921 |
| France          | 0.926 |
| Germany         | 0.905 |
| Greece          | 0.922 |
| Hungary         | 0.836 |
| Iceland         | 0.944 |
| Ireland         | 0.923 |
| Israel          | 0.935 |
| Italy           | 0.944 |
| Japan           | 0.963 |
| Korea           | 0.938 |
| Latvia          | 0.803 |
| Lithuania       | 0.810 |
| Luxembourg      | 0.923 |
| Mexico          | 0.757 |
| Netherlands     | 0.926 |
| New Zealand     | 0.915 |
| Norway          | 0.929 |
| Poland          | 0.862 |
| Portugal        | 0.918 |
| Slovak Republic | 0.839 |
| Slovenia        | 0.914 |
| Spain           | 0.947 |
| Sweden          | 0.936 |
| Switzerland     | 0.945 |
| Turkey          | 0.804 |
| United Kingdom  | 0.903 |
| United States   | 0.848 |

SOURCE: UN INEQUALITY-ADJUSTED HUMAN DEVELOPMENT INDEX 2019, [HTTP://HDR.UNDP.ORG/EN/CONTENT/INEQUALITY-ADJUSTED-HUMAN-DEVELOPMENT-INDEX-IHDI](http://hdr.undp.org/en/content/inequality-adjusted-human-development-index-ihdi)

TABLE A19 Infant mortality rates, deaths/1000 live births,  
OECD countries, 2018 or latest available

| Country         | Rate |
|-----------------|------|
| Australia       | 3.3  |
| Austria         | 2.9  |
| Belgium         | 3.6  |
| Canada          | 4.5  |
| Chile           | 7.0  |
| Czech Republic  | 2.7  |
| Denmark         | 3.8  |
| Estonia         | 2.3  |
| Finland         | 2.0  |
| France          | 3.8  |
| Germany         | 3.3  |
| Greece          | 3.5  |
| Hungary         | 3.5  |
| Iceland         | 2.7  |
| Ireland         | 3.0  |
| Israel          | 3.1  |
| Italy           | 2.7  |
| Japan           | 1.9  |
| Korea           | 2.8  |
| Latvia          | 4.1  |
| Lithuania       | 3.0  |
| Luxembourg      | 3.2  |
| Mexico          | 12.1 |
| Netherlands     | 3.6  |
| New Zealand     | 4.3  |
| Norway          | 2.3  |
| Poland          | 4.0  |
| Portugal        | 2.7  |
| Slovak Republic | 4.5  |
| Slovenia        | 2.1  |
| Spain           | .7   |
| Sweden          | 2.4  |
| Switzerland     | 3.5  |
| Turkey          | 9.2  |
| United Kingdom  | 3.9  |
| United States   | 5.8  |

*Note:* The infant mortality rate is defined as the number of deaths of children under one year of age, expressed per 1 000 live births.

*SOURCE:* OECD DATA, [HTTPS://DATA.OECD.ORG/HEALTHSTAT/INFANT-MORTALITY-RATES.HTM](https://data.oecd.org/healthstat/infant-mortality-rates.htm)

TABLE A20 Democracy indexes, OECD countries, 2019

| Country                        | Overall Score |
|--------------------------------|---------------|
| Australia <sup>[a]</sup>       | 9.09          |
| Austria <sup>[a]</sup>         | 8.29          |
| Belgium <sup>[b]</sup>         | 7.64          |
| Canada <sup>[a]</sup>          | 9.22          |
| Chile <sup>[a]</sup>           | 8.08          |
| Czech Republic <sup>[b]</sup>  | 7.69          |
| Denmark <sup>[a]</sup>         | 9.22          |
| Estonia <sup>[b]</sup>         | 7.90          |
| Finland <sup>[a]</sup>         | 9.25          |
| France <sup>[a]</sup>          | 8.12          |
| Germany <sup>[a]</sup>         | 8.68          |
| Greece <sup>[b]</sup>          | 7.43          |
| Hungary <sup>[b]</sup>         | 6.63          |
| Iceland <sup>[a]</sup>         | 9.58          |
| Ireland <sup>[a]</sup>         | 9.24          |
| Israel <sup>[b]</sup>          | 7.86          |
| Italy <sup>[b]</sup>           | 7.52          |
| Japan <sup>[b]</sup>           | 7.99          |
| Korea <sup>[b]</sup>           | 8.00          |
| Latvia <sup>[b]</sup>          | 7.49          |
| Lithuania <sup>[b]</sup>       | 7.50          |
| Luxembourg <sup>[a]</sup>      | 8.81          |
| Mexico <sup>[b]</sup>          | 6.09          |
| Netherlands <sup>[a]</sup>     | 9.01          |
| New Zealand <sup>[a]</sup>     | 9.26          |
| Norway <sup>[a]</sup>          | 9.87          |
| Poland <sup>[b]</sup>          | 6.62          |
| Portugal <sup>[a]</sup>        | 8.03          |
| Slovak Republic <sup>[b]</sup> | 7.17          |
| Slovenia <sup>[b]</sup>        | 7.50          |
| Spain <sup>[a]</sup>           | 8.29          |
| Sweden <sup>[a]</sup>          | 9.39          |
| Switzerland <sup>[a]</sup>     | 9.03          |
| Turkey <sup>[c]</sup>          | 4.09          |
| United Kingdom <sup>[a]</sup>  | 8.52          |
| United States <sup>[b]</sup>   | 7.96          |

[a] Full democracy

[b] Flawed democracy

[c] Hybrid regime

*Note:* Democracy Indexes encompass 'electoral process/pluralism, functioning of government, political participation, political culture, and civil liberties.'

*SOURCE:* THE ECONOMIST INTELLIGENCE UNIT 2019, [HTTP://WWW.EIU.COM/HANDLERS/WHITEPAPERHANDLER.ASHX?FI=DEMOCRACY-INDEX-2019.PDF&MODE=WP&CAMPAIGNID=DEMOCRACYINDEX2019](http://www.eiu.com/handlers/whitepaperhandler.ashx?fi=DEMOCRACY-INDEX-2019.PDF&MODE=WP&CAMPAIGNID=DEMOCRACYINDEX2019)

TABLE A21 Civil liberties indexes, OECD countries 2019

| Country         | Score |
|-----------------|-------|
| Australia       | 10.00 |
| Austria         | 8.82  |
| Belgium         | 8.53  |
| Canada          | 9.71  |
| Chile           | 9.12  |
| Czech Republic  | 8.53  |
| Denmark         | 9.12  |
| Estonia         | 8.53  |
| Finland         | 9.71  |
| France          | 8.53  |
| Germany         | 9.41  |
| Greece          | 8.53  |
| Hungary         | 7.06  |
| Iceland         | 9.71  |
| Ireland         | 10.00 |
| Israel          | 5.88  |
| Italy           | 7.94  |
| Japan           | 8.82  |
| Korea           | 8.24  |
| Latvia          | 8.82  |
| Lithuania       | 9.12  |
| Luxembourg      | 9.71  |
| Mexico          | 6.18  |
| Netherlands     | 9.12  |
| New Zealand     | 10.00 |
| Norway          | 9.71  |
| Poland          | 7.35  |
| Portugal        | 9.12  |
| Slovak Republic | 7.94  |
| Slovenia        | 8.24  |
| Spain           | 8.82  |
| Sweden          | 9.41  |
| Switzerland     | 9.12  |
| Turkey          | 2.35  |
| United Kingdom  | 9.12  |
| United States   | 8.24  |

SOURCE: THE ECONOMIST INTELLIGENCE UNIT 2019, [HTTP://WWW.EIU.COM/HANDLERS/WHITEPAPERHANDLER.ASHX?FI=DEMOCRACY-INDEX-2019.PDF&MODE=WP&CAMPAIGNID=DEMOCRACYINDEX2019](http://www.eiu.com/handlers/whitepaperhandler.ashx?FI=DEMOCRACY-INDEX-2019.PDF&MODE=WP&CAMPAIGNID=DEMOCRACYINDEX2019)

TABLE A22 General social freedom scores, OECD countries 2018

| Country         | Score |
|-----------------|-------|
| Australia       | 98    |
| Austria         | 93    |
| Belgium         | 96    |
| Canada          | 99    |
| Chile           | 94    |
| Czech Republic  | 91    |
| Denmark         | 97    |
| Estonia         | 99    |
| Finland         | 100   |
| France          | 90    |
| Germany         | 94    |
| Greece          | 87    |
| Hungary         | 70    |
| Iceland         | 94    |
| Ireland         | 97    |
| Israel          | 78    |
| Italy           | 89    |
| Japan           | 96    |
| Korea           | 83    |
| Latvia          | 87    |
| Lithuania       | 91    |
| Luxembourg      | 98    |
| Mexico          | 63    |
| Netherlands     | 99    |
| New Zealand     | 98    |
| Norway          | 100   |
| Poland          | 84    |
| Portugal        | 96    |
| Slovak Republic | 88    |
| Slovenia        | 94    |
| Spain           | 94    |
| Sweden          | 100   |
| Switzerland     | 96    |
| Turkey          | 31    |
| United Kingdom  | 93    |
| United States   | 86    |

SOURCE: FREEDOM HOUSE: FREEDOM IN THE WORLD 2019,  
[HTTPS://FREEDOMHOUSE.ORG/REPORT/FREEDOM-WORLD/  
 FREEDOM-WORLD-2019/DEMOCRACY-IN-RETREAT](https://freedomhouse.org/report/freedom-world/freedom-world-2019/democracy-in-retreat)



TABLE A23 Voice and accountability ranking, OECD countries, 2018

| Country         | Percentile rank |
|-----------------|-----------------|
| Australia       | 95.57           |
| Austria         | 93.10           |
| Belgium         | 94.09           |
| Canada          | 96.06           |
| Chile           | 82.27           |
| Czech Republic  | 78.33           |
| Denmark         | 98.03           |
| Estonia         | 89.66           |
| Finland         | 98.52           |
| France          | 88.18           |
| Germany         | 95.07           |
| Greece          | 75.37           |
| Hungary         | 58.62           |
| Iceland         | 94.58           |
| Ireland         | 92.12           |
| Israel          | 69.95           |
| Italy           | 69.95           |
| Japan           | 80.30           |
| Korea           | 73.89           |
| Latvia          | 74.88           |
| Lithuania       | 77.83           |
| Luxembourg      | 96.55           |
| Mexico          | 45.81           |
| Netherlands     | 97.04           |
| New Zealand     | 99.51           |
| Norway          | 100.00          |
| Poland          | 71.92           |
| Portugal        | 88.67           |
| Slovak Republic | 76.85           |
| Slovenia        | 79.31           |
| Spain           | 82.76           |
| Sweden          | 97.54           |
| Switzerland     | 99.01           |
| Turkey          | 25.12           |
| United Kingdom  | 93.60           |
| United States   | 81.28           |

*Note:* 'Reflects perceptions of the extent to which a country's citizens are able to participate in selecting their government, as well as freedom of expression, freedom of association, and a free media.' Percentile rank among all countries (ranges from 0 (lowest) to 100 (highest) rank)

*SOURCE:* WORLD BANK, THE WORLDWIDE GOVERNANCE INDICATORS (WGI), [HTTPS://INFO.WORLDBANK.ORG/GOVERNANCE/WGI/](https://info.worldbank.org/governance/WGI/)

TABLE A24 National privacy rankings, OECD countries, 2007

| Country                    | Score |
|----------------------------|-------|
| Australia                  | 2.2   |
| Austria                    | 2.3   |
| Belgium                    | 2.7   |
| Canada                     | 2.9   |
| Chile <sup>[a]</sup>       | 2.2   |
| Czech Republic             | 2.5   |
| Denmark                    | 2.0   |
| Estonia                    | 2.8   |
| Finland                    | 2.5   |
| France                     | 1.9   |
| Germany                    | 2.8   |
| Greece                     | 3.1   |
| Hungary                    | 2.9   |
| Iceland                    | 2.7   |
| Ireland                    | 2.5   |
| Israel                     | 2.2   |
| Italy                      | 2.8   |
| Japan                      | 2.2   |
| South Korea <sup>[a]</sup> | 2.2   |
| Latvia                     | 2.2   |
| Lithuania <sup>[a]</sup>   | 2.2   |
| Luxembourg                 | 2.8   |
| Mexico                     | 2.2   |
| Netherlands                | 2.1   |
| New Zealand                | 2.3   |
| Norway                     | 2.1   |
| Poland                     | 2.3   |
| Portugal                   | 2.8   |
| Slovakia                   | 2.1   |
| Slovenia                   | 2.8   |
| Spain                      | 2.3   |
| Sweden                     | 2.1   |

TABLE A24 National privacy rankings (*cont.*)

| Country               | Score |
|-----------------------|-------|
| Switzerland           | 2.4   |
| Turkey <sup>[a]</sup> | 2.2   |
| UK                    | 1.4   |
| US                    | 1.5   |

[a] Imputed values

*Note:* Privacy Score includes: Constitutional protection, Statutory protection, Privacy enforcement, Identity cards and biometrics, Data-sharing, Visual surveillance, Communication interception, Workplace monitoring, Government access to data, Communications data retention, Surveillance of medical, financial and movement, Border and trans-border issues, Leadership, Democratic safeguards. Higher scores, better privacy.

*SOURCE:* PRIVACY INTERNATIONAL, NATIONAL PRIVACY RANKING 2007, [HTTP://OBSERVATORIODESEGURANCA.ORG/FILES/PHRCOMP\\_SORT.PDF](http://OBSERVATORIODESEGURANCA.ORG/FILES/PHRCOMP_SORT.PDF)

TABLE A25 Generalized social inequality scores, OECD countries, 2017

| Country        | Score |
|----------------|-------|
| Australia      | 7     |
| Austria        | 0     |
| Belgium        | 7     |
| Canada         | 6     |
| Chile          | 2     |
| Czech Republic | 38    |
| Denmark        | 5     |
| Estonia        | 23    |
| Finland        | 21    |
| France         | 11    |
| Germany        | 33    |
| Greece         | 21    |
| Hungary        | 36    |

TABLE A25 Generalized social inequality scores (*cont.*)

| Country         | Score |
|-----------------|-------|
| Iceland         | 16    |
| Ireland         | 12    |
| Israel          | 12    |
| Italy           | 16    |
| Japan           | 7     |
| Korea           | 39    |
| Latvia          | 21    |
| Lithuania       | 21    |
| Luxembourg      | 6     |
| Mexico          | 0     |
| Netherlands     | 29    |
| New Zealand     | 14    |
| Norway          | 19    |
| Poland          | 53    |
| Portugal        | 12    |
| Slovak Republic | 7     |
| Slovenia        | 22    |
| Spain           | 16    |
| Sweden          | 7     |
| Switzerland     | 37    |
| Turkey          | 6     |
| United Kingdom  | 46    |
| United States   | 42    |

*Note:* Social Inequality is part of the OECD Better Life Index: Civic Engagement (along with voter turnout and *Stakeholder engagement for developing regulations*)

*SOURCE:* OECD BETTER LIFE INDEX, [HTTP://WWW](http://www.oecdbetterlifeindex.org/topics/civic-engagement/)

[.OECDBETTERLIFEINDEX.ORG/TOPICS/CIVIC-ENGAGEMENT/](http://www.oecdbetterlifeindex.org/topics/civic-engagement/)

TABLE A26 The political terror scale (human rights violations),  
OECD countries, 2018 or nearest year

| Country         | Score |
|-----------------|-------|
| Australia       | 2     |
| Austria         | 1     |
| Belgium         | 1     |
| Canada          | 1     |
| Chile           | 2     |
| Czech Republic  | 1     |
| Denmark         | 1     |
| Estonia         | 1     |
| Finland         | 1     |
| France          | 1     |
| Germany         | 1     |
| Greece          | 2     |
| Hungary         | 2     |
| Iceland         | 1     |
| Ireland         | 1     |
| Israel          | 4     |
| Italy           | 2     |
| Japan           | 1     |
| Korea           | 2     |
| Latvia          | 1     |
| Lithuania       | 1     |
| Luxembourg      | 1     |
| Mexico          | 4     |
| Netherlands     | 1     |
| New Zealand     | 1     |
| Norway          | 1     |
| Poland          | 2     |
| Portugal        | 1     |
| Slovak Republic | 1     |
| Slovenia        | 1     |
| Spain           | 2     |
| Sweden          | 1     |
| Switzerland     | 1     |
| Turkey          | 4     |
| United Kingdom  | 1     |
| United States   | 3     |

*Note:* Larger score from Amnesty International or Human Rights Watch

*SOURCE:* THE POLITICAL TERROR SCALE, [HTTP://WWW.POLITICALTERRORSCALE.ORG/DATA/DOWNLOAD.HTML](http://www.politicalterroryscale.org/data/download.html)

TABLE A27 World press freedom indexes, OECD countries, 2019

| Country         | Index of Abuses/Violence <sup>[a]</sup> |
|-----------------|-----------------------------------------|
| Australia       | 16.55                                   |
| Austria         | 15.33                                   |
| Belgium         | 12.07                                   |
| Canada          | 15.69                                   |
| Chile           | 25.65                                   |
| Czech Republic  | 24.89                                   |
| Denmark         | 9.87                                    |
| Estonia         | 12.27                                   |
| Finland         | 7.90                                    |
| France          | 22.21                                   |
| Germany         | 14.60                                   |
| Greece          | 29.08                                   |
| Hungary         | 30.44                                   |
| Iceland         | 14.71                                   |
| Ireland         | 15.00                                   |
| Israel          | 30.80                                   |
| Italy           | 24.90                                   |
| Japan           | 29.36                                   |
| Korea           | 24.94                                   |
| Latvia          | 19.53                                   |
| Lithuania       | 22.06                                   |
| Luxembourg      | 15.66                                   |
| Mexico          | 46.78                                   |
| Netherlands     | 8.83                                    |
| New Zealand     | 10.75                                   |
| Norway          | 7.82                                    |
| Poland          | 28.89                                   |
| Portugal        | 12.63                                   |
| Slovak Republic | 23.58                                   |
| Slovenia        | 22.31                                   |
| Spain           | 21.99                                   |
| Sweden          | 8.31                                    |
| Switzerland     | 10.52                                   |
| Turkey          | 52.81                                   |
| United Kingdom  | 22.23                                   |
| United States   | 25.69                                   |

[a] Score on Abuses and Acts of Violence Against Journalists and Score on Pluralism, Media Independence, Environment and Self-Censorship, Legislative Framework, Transparency, Infrastructure

*Note:* The Lower (Higher) Index, the Greater (Lesser) Press Freedom

*SOURCE:* REPORTERS WITHOUT BORDERS, 2019 WORLD PRESS FREEDOM INDEX, [HTTPS://RSF.ORG/EN/RANKING](https://rsf.org/en/ranking)

TABLE A28 Prison population rate (per 100,000), OECD countries, 2018 or nearest year

| Country         | Rate |
|-----------------|------|
| Australia       | 172  |
| Austria         | 98   |
| Belgium         | 88   |
| Canada          | 114  |
| Chile           | 233  |
| Czech Republic  | 205  |
| Denmark         | 63   |
| Estonia         | 195  |
| Finland         | 51   |
| France          | 100  |
| Germany         | 75   |
| Greece          | 97   |
| Hungary         | 173  |
| Iceland         | 37   |
| Ireland         | 78   |
| Israel          | 236  |
| Italy           | 98   |
| Japan           | 41   |
| Korea           | 109  |
| Latvia          | 195  |
| Lithuania       | 235  |
| Luxembourg      | 107  |
| Mexico          | 164  |
| Netherlands     | 61   |
| New Zealand     | 214  |
| Norway          | 63   |
| Poland          | 194  |
| Portugal        | 127  |
| Slovak Republic | 191  |
| Slovenia        | 64   |
| Spain           | 126  |
| Sweden          | 59   |
| Switzerland     | 81   |
| Turkey          | 288  |
| United Kingdom  | 40   |
| United States   | 655  |

SOURCE: INTERNATIONAL CENTRE FOR PRISON STUDIES, THE WORLD PRISON BRIEF, [HTTPS://WWW.PRISONSTUDIES.ORG/SITES/DEFAULT/FILES/RESOURCES/DOWNLOADS/WPPL\\_12.PDF](https://www.prisonstudies.org/sites/default/files/resources/downloads/wppl_12.pdf)

TABLE A29 Death sentences and executions, OECD countries,  
2018 or nearest year

| Country         | Number <sup>[a]</sup> |
|-----------------|-----------------------|
| Australia       | 0                     |
| Austria         | 0                     |
| Belgium         | 0                     |
| Canada          | 0                     |
| Chile           | 0                     |
| Czech Republic  | 0                     |
| Denmark         | 0                     |
| Estonia         | 0                     |
| Finland         | 0                     |
| France          | 0                     |
| Germany         | 0                     |
| Greece          | 0                     |
| Hungary         | 0                     |
| Iceland         | 0                     |
| Ireland         | 0                     |
| Israel          | 0                     |
| Italy           | 0                     |
| Japan           | 135                   |
| Korea           | 0                     |
| Latvia          | 0                     |
| Lithuania       | 0                     |
| Luxembourg      | 0                     |
| Mexico          | 0                     |
| Netherlands     | 0                     |
| New Zealand     | 0                     |
| Norway          | 0                     |
| Poland          | 0                     |
| Portugal        | 0                     |
| Slovak Republic | 0                     |
| Slovenia        | 0                     |
| Spain           | 0                     |
| Sweden          | 0                     |
| Switzerland     | 0                     |
| Turkey          | 0                     |
| United Kingdom  | 0                     |
| United States   | 2724                  |

[a] Recorded Executions, Recorded Death Sentences and People  
Known to Be Under Sentence of Death at the End of 2018.

SOURCE: AMNESTY INTERNATIONAL GLOBAL REPORT, DEATH  
SENTENCES AND EXECUTIONS 2018



TABLE A30 Global peace index, OECD countries, 2019

| Country                   | Index |
|---------------------------|-------|
| Australia                 | 1.419 |
| Austria                   | 1.291 |
| Belgium                   | 1.533 |
| Canada                    | 1.327 |
| Chile                     | 1.634 |
| Czech Republic            | 1.375 |
| Denmark                   | 1.316 |
| Estonia                   | 1.727 |
| Finland                   | 1.488 |
| France                    | 1.892 |
| Germany                   | 1.547 |
| Greece                    | 1.933 |
| Hungary                   | 1.540 |
| Iceland                   | 1.072 |
| Ireland                   | 1.390 |
| Israel                    | 2.735 |
| Italy                     | 1.754 |
| Japan                     | 1.369 |
| Korea                     | 1.867 |
| Latvia                    | 1.718 |
| Lithuania                 | 1.728 |
| Luxembourg <sup>[a]</sup> | 1.533 |
| Mexico                    | 2.600 |
| Netherlands               | 1.530 |
| New Zealand               | 1.221 |
| Norway                    | 1.536 |
| Poland                    | 1.654 |
| Portugal                  | 1.274 |
| Slovak Republic           | 1.550 |
| Slovenia                  | 1.355 |
| Spain                     | 1.699 |
| Sweden                    | 1.533 |
| Switzerland               | 1.383 |
| Turkey                    | 3.015 |
| United Kingdom            | 1.801 |
| United States             | 2.401 |

[a] Imputed values

*Note:* A lower (higher) index indicates greater (lesser) peace in society. The Global Peace Index 'measures the state of peace using three thematic domains: the level of Societal Safety and Security; the extent of Ongoing Domestic and International Conflict; and the degree of Militarisation.'

*SOURCE:* GLOBAL PEACE INDEX 2019, INSTITUTE FOR ECONOMICS AND PEACE, [HTTP://VISIONOFHUMANITY.ORG/APP/UPLOADS/2019/06/GPI-2019-WEB003.PDF](http://visionofhumanity.org/app/uploads/2019/06/GPI-2019-WEB003.PDF)
